# Supplementary material for: Medical Rehabilitation of Patients with Post-Covid-19 Syn-drome – a Comparison of Aerobic Interval and Continuous Training
Source: Preprints.org preprint supplement (doi:10.20944/preprints202309.0651.v1), 2023-09-11
Supplement: Supplementary file 1 [file supplementary]

# Supplementary Material

Table S1. Anthropometric and clinical data of CAD patients.

|                                | CAD<br>(n=96) |
|--------------------------------|---------------|
| Anthropometric data            |               |
| Age, years                     | 50.3 ± 6.6    |
| Sex, n (%)                     |               |
| female                         | 24 (25.0)     |
| male                           | 72 (75.0)     |
| Height, cm                     | 174.6 ± 8.5   |
| Weight, kg                     | 92.2 ± 17.3   |
| BMI, kg*m <sup>-2</sup>        | 30.1 ± 4.8    |
| Clinical data                  |               |
| Coronary artery disease, n (%) | 96 (100)      |
| One vessel disease             | 43 (44.8)     |
| Two vessel disease             | 32 (33.3)     |
| Three vessel disease           | 21 (21.9)     |
| Myocardial infarction, n (%)   | 83 (86.5)     |
| STEMI                          | 52 (54.2)     |
| NSTEMI                         | 31 (32.3)     |

Only main diagnoses are listed. Data is presented as mean ± SD or n (%). BMI, Body Mass Index; STEMI, ST-Elevation Myocardial Infarction; NSTEMI, Non-ST-Elevation Myocardial Infarction.
